# Supplementary material for: The Phylodynamic and Spread of the Invasive Asian Malaria Vectors, Anopheles stephensi, in Sudan
Source: MDPI journal article supplement (doi:10.3390/biology11030409), 2022-03-07
Supplement: s1 [file s1]

## Supplementary File 1:

**Table S1:** The accessions number of sequences of *An. stephensi* that are currently available in the GenBank and were included in the analysis and comparing of our sequences.

### India:

|            |            |            |            |            |            |
|------------|------------|------------|------------|------------|------------|
| DQ154166.1 | AY729980.1 | DQ310143.1 | DQ310148.1 | DQ317594.1 | MG571266.1 |
| MH512893.1 | MH538702.1 | MH538703.1 | MH538704.1 | MH538705.1 | MK265738.1 |
| MK265740.1 | MK265741.1 | MK265742.1 | MK265743.1 | MK265744.1 | MK704465.1 |
| MK726121.1 | LR736010.1 | LR736014.1 | LR736013.1 | LR736015.1 | MN329060.1 |
| MN660044.1 | MT899149.1 | MW549046.1 |            |            |            |

### Pakistan:

|            |            |            |            |            |            |
|------------|------------|------------|------------|------------|------------|
| KF406680.1 | KF406682.1 | KF406683.1 | KF406684.1 | KF406685.1 | KF406686.1 |
| KF406687.1 | KF406688.1 | KF406689.1 | KF406690.1 | KF406691.1 | KF406692.1 |
| KF406693.1 | KF406694.1 | KF406695.1 | KF406696.1 | KF406697.1 | KF406698.1 |
| KF406699.1 | KF406700.1 | KF406701.1 | KF406702.1 | KF406703.1 | KF406704.1 |
| KF406705.1 | KF406706.1 | KF406707.1 | KF406708.1 | KJ528895.1 |            |

### Sri Lanka:

|            |            |            |            |            |            |
|------------|------------|------------|------------|------------|------------|
| MF124608.1 | MF124609.1 | MF124610.1 | MF124611.1 | MF975722.1 | MF975723.1 |
| MF975724.1 | MF975725.1 | MF975726.1 | MF975727.1 | MF975728.1 | MF975729.1 |
| MF975730.1 | MF975731.1 | MG970564.1 | MG970566.1 | MG970565.1 | MG970567.1 |

### Saudi Arabia:

|            |            |            |            |            |            |
|------------|------------|------------|------------|------------|------------|
| KJ528887.1 | KJ528888.1 | KJ528889.1 | KJ528890.1 | KJ528891.1 | KJ528892.1 |
| KJ528893.1 | KJ528894.1 |            |            |            |            |

### Sudan:

|            |            |            |
|------------|------------|------------|
| MW197099.1 | MW197100.1 | MW197101.1 |
|------------|------------|------------|

### Iran:

|            |            |
|------------|------------|
| FJ210893.1 | FJ210894.1 |
|------------|------------|

### Djibouti:

|            |
|------------|
| KF933378.1 |
|------------|

### Ethiopia:

|            |
|------------|
| MH651000.1 |
|------------|

### United Arab Emirates:

|            |
|------------|
| MK170098.1 |
|------------|

**Supplementary File 2.**

**Table S2:** P values of the pairwise Fst test was computed to estimate the degree of gene flow among the different populations.

|                     | <b>North Darfur</b> | <b>River Nile</b> | <b>Khartoum</b> | <b>Red Sea</b> | <b>Kassala</b> | <b>Al Gedarif</b> | <b>India</b> | <b>Iran</b> | <b>Pakistan</b> | <b>Saudi Arabia</b> | <b>Sri Lanka</b> |
|---------------------|---------------------|-------------------|-----------------|----------------|----------------|-------------------|--------------|-------------|-----------------|---------------------|------------------|
| <b>River Nile</b>   | 0.008               | -                 | -               | -              | -              | -                 | -            | -           | -               | -                   | -                |
| <b>Khartoum</b>     | 0.007               | 0.006             | -               | -              | -              | -                 | -            | -           | -               | -                   | -                |
| <b>Red_Sea</b>      | 0.010               | 0.006             | 0.007           | -              | -              | -                 | -            | -           | -               | -                   | -                |
| <b>Kassala</b>      | 0.010               | 0.006             | 0.007           | 0.003          | -              | -                 | -            | -           | -               | -                   | -                |
| <b>Al Gedarif</b>   | 0.011               | 0.007             | 0.008           | 0.004          | 0.005          | -                 | -            | -           | -               | -                   | -                |
| <b>India</b>        | 0.010               | 0.005             | 0.007           | 0.002          | 0.002          | 0.004             | -            | -           | -               | -                   | -                |
| <b>Iran</b>         | 0.012               | 0.007             | 0.009           | 0.004          | 0.005          | 0.006             | 0.003        | -           | -               | -                   | -                |
| <b>Pakistan</b>     | 0.009               | 0.005             | 0.007           | 0.002          | 0.002          | 0.003             | 0.001        | 0.003       | -               | -                   | -                |
| <b>Saudi Arabia</b> | 0.016               | 0.013             | 0.013           | 0.012          | 0.011          | 0.010             | 0.012        | 0.015       | 0.012           | -                   | -                |
| <b>Sri Lanka</b>    | 0.010               | 0.005             | 0.007           | 0.002          | 0.003          | 0.004             | 0.001        | 0.004       | 0.001           | 0.013               | -                |
| <b>Sudan</b>        | 0.009               | 0.005             | 0.005           | 0.003          | 0.003          | 0.004             | 0.002        | 0.005       | 0.002           | 0.011               | 0.003            |

**Supplementary File 3:****Table S3:** Pairwise fixation index (Fst values) between *An. stephensi* populations calculated from the nucleotide data set of the mitochondrial cytochrome c oxidase subunit 1 (cox1) gene.

| <b>Populations*</b> | <b>India</b> | <b>Iran</b> | <b>Pakistan</b> | <b>Saudi Arabia</b> | <b>Sri Lanka</b> |
|---------------------|--------------|-------------|-----------------|---------------------|------------------|
| <b>Iran</b>         | 0.876        | -           | -               | -                   | -                |
| <b>Pakistan</b>     | 0.023        | 0.906       | -               | -                   | -                |
| <b>Saudi Arabia</b> | 0.879        | 0.927       | 0.885           | -                   | -                |
| <b>Sri Lanka</b>    | 0.126        | 0.824       | 0.224           | 0.863               | -                |
| <b>Sudan</b>        | 0.067        | 0.593       | 0.071           | 0.729               | 0.104            |

\*All sequences representing Sudan were included in Sudan population. Populations consisted of one sequence were not included in the comparison.

**Supplementary File 4:**

**Table S4:** The distribution of the detected haplotypes among the different study sites compared to the previously published *An. stephensi* cytochrome c oxidase 1 (CO1) sequences.

| Populations  | Hap 01 | Hap 02 | Hap 03 | Hap 04 | Hap 05 | Hap 06 | Hap 07 | Hap 08 | Hap 09 | Hap 10 | Hap 11 | Hap 12 | Hap 13 | Hap 14 | Hap 15 | Hap 16 | Hap 17 | Hap 18 | Hap 19 |
|--------------|--------|--------|--------|--------|--------|--------|--------|--------|--------|--------|--------|--------|--------|--------|--------|--------|--------|--------|--------|
| North Darfur | 1      | 0      | 0      | 0      | 0      | 0      | 0      | 0      | 0      | 0      | 0      | 1      | 1      | 1      | 1      | 1      | 0      | 0      | 0      |
| River Nile   | 3      | 0      | 0      | 3      | 0      | 0      | 0      | 0      | 0      | 0      | 0      | 1      | 2      | 0      | 0      | 0      | 1      | 1      | 0      |
| Khartoum     | 1      | 0      | 0      | 1      | 0      | 0      | 0      | 0      | 0      | 0      | 0      | 2      | 0      | 1      | 0      | 0      | 0      | 0      | 0      |
| Red Sea      | 124    | 24     | 7      | 10     | 5      | 5      | 8      | 1      | 1      | 1      | 1      | 0      | 0      | 0      | 0      | 0      | 0      | 0      | 0      |
| Kassala      | 60     | 8      | 6      | 6      | 4      | 2      | 3      | 1      | 1      | 2      | 1      | 0      | 0      | 0      | 0      | 0      | 0      | 0      | 0      |
| Gezira       | 0      | 0      | 0      | 1      | 0      | 0      | 0      | 0      | 0      | 0      | 0      | 0      | 0      | 0      | 0      | 0      | 0      | 0      | 0      |
| Gedarif      | 56     | 6      | 12     | 2      | 3      | 4      | 2      | 3      | 3      | 2      | 3      | 0      | 0      | 0      | 0      | 0      | 0      | 0      | 0      |
| Pakistan     | 26     | 0      | 0      | 1      | 0      | 0      | 0      | 0      | 0      | 0      | 1      | 0      | 0      | 0      | 0      | 0      | 0      | 0      | 1      |
| Djibouti     | 1      | 0      | 0      | 0      | 0      | 0      | 0      | 0      | 0      | 0      | 0      | 0      | 0      | 0      | 0      | 0      | 0      | 0      | 0      |
| Sri Lanka    | 12     | 6      | 0      | 0      | 0      | 0      | 0      | 0      | 0      | 0      | 0      | 0      | 0      | 0      | 0      | 0      | 0      | 0      | 0      |
| India        | 23     | 2      | 0      | 0      | 2      | 0      | 0      | 0      | 0      | 0      | 0      | 0      | 0      | 0      | 0      | 0      | 0      | 0      | 0      |
| Sudan*       | 1      | 0      | 0      | 2      | 0      | 0      | 0      | 0      | 0      | 0      | 0      | 0      | 0      | 0      | 0      | 0      | 0      | 0      | 0      |
| UAE          | 1      | 0      | 0      | 0      | 0      | 0      | 0      | 0      | 0      | 0      | 0      | 0      | 0      | 0      | 0      | 0      | 0      | 0      | 0      |
| Ethiopia     | 0      | 0      | 0      | 1      | 0      | 0      | 0      | 0      | 0      | 0      | 0      | 0      | 0      | 0      | 0      | 0      | 0      | 0      | 0      |
| Saudi Arabia | 0      | 0      | 5      | 0      | 0      | 0      | 0      | 1      | 1      | 1      | 0      | 0      | 0      | 0      | 0      | 0      | 0      | 0      | 0      |
| Iran         | 0      | 0      | 0      | 0      | 0      | 2      | 0      | 0      | 0      | 0      | 0      | 0      | 0      | 0      | 0      | 0      | 0      | 0      | 0      |

**Hap:** haplotype, **UAE:** United Arab Emirates. **Sudan\*:** indicates previously published sequences from Sudan.
